# Supplementary material for: Molecular Data Reveal a Cryptic Diversity in the Genus Urotricha (Alveolata, Ciliophora, Prostomatida), a Key Player in Freshwater Lakes, With Remarks on Morphology, Food Preferences, and Distribution
Source: PubMed Central journal article supplement (PMC8854374; doi:10.3389/fmicb.2021.787290), 2022-02-04
Supplement: Data_Sheet_1.pdf [file Data_Sheet_1.pdf]

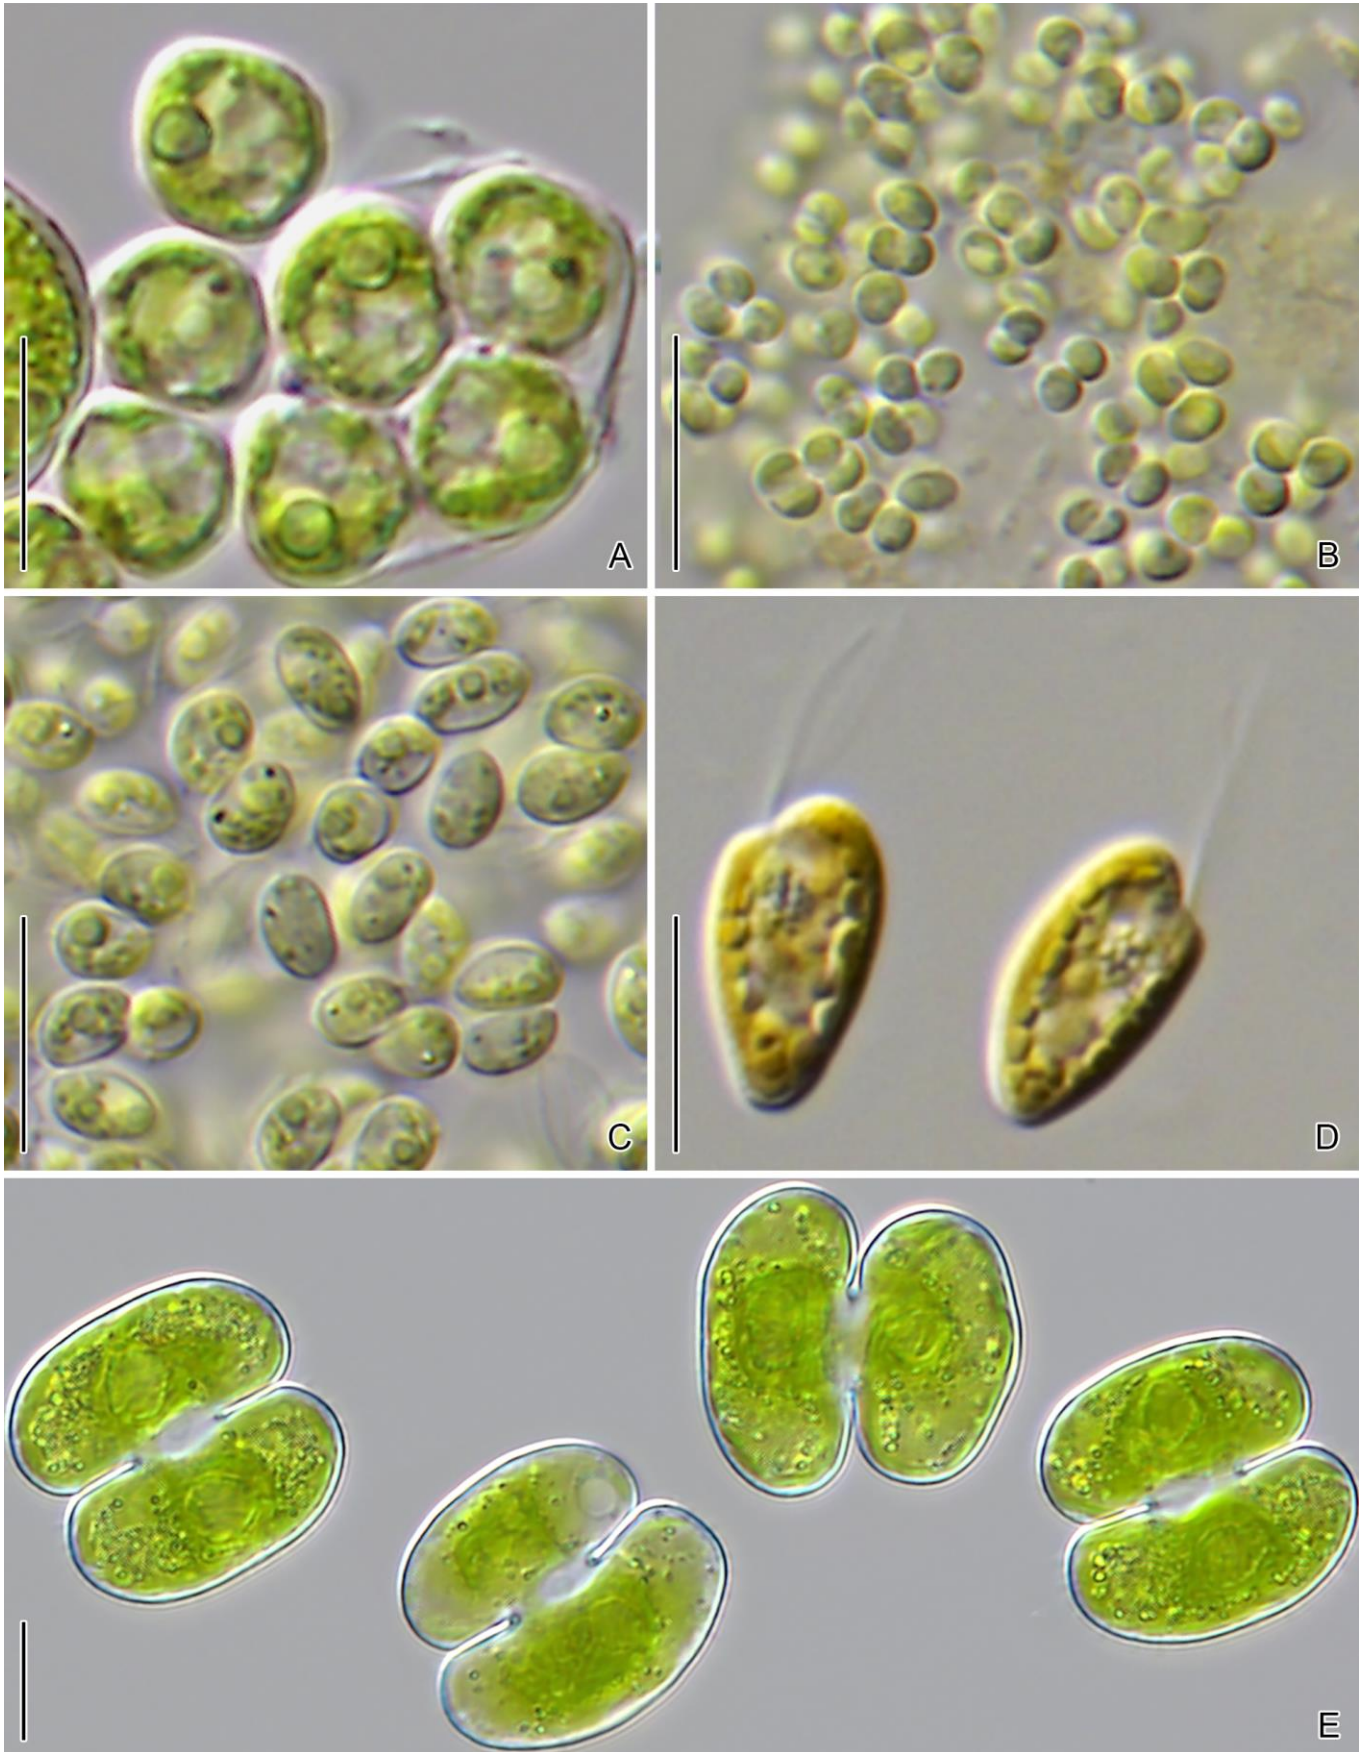

**Supplementary Figure 1** | Algal strains used for feeding experiments with *U. castalia* (strain CIL-2017/25): (A) MS-2017/1 *Coelastrum* sp., (B) MS-2017/2 *Choricystis* sp., (C) MS-2017/7 *Acutodesmus obliquus*, (D) SAG 26.80 *Cryptomonas* sp., and (E) MS-2018/1 *Cosmarium* sp.; scale bar = 10  $\mu$ m.

SSU rRNA secondary structure model  
of *Urotricha castalia*  
(CIL-2017/25)  
Accession number: MW077193

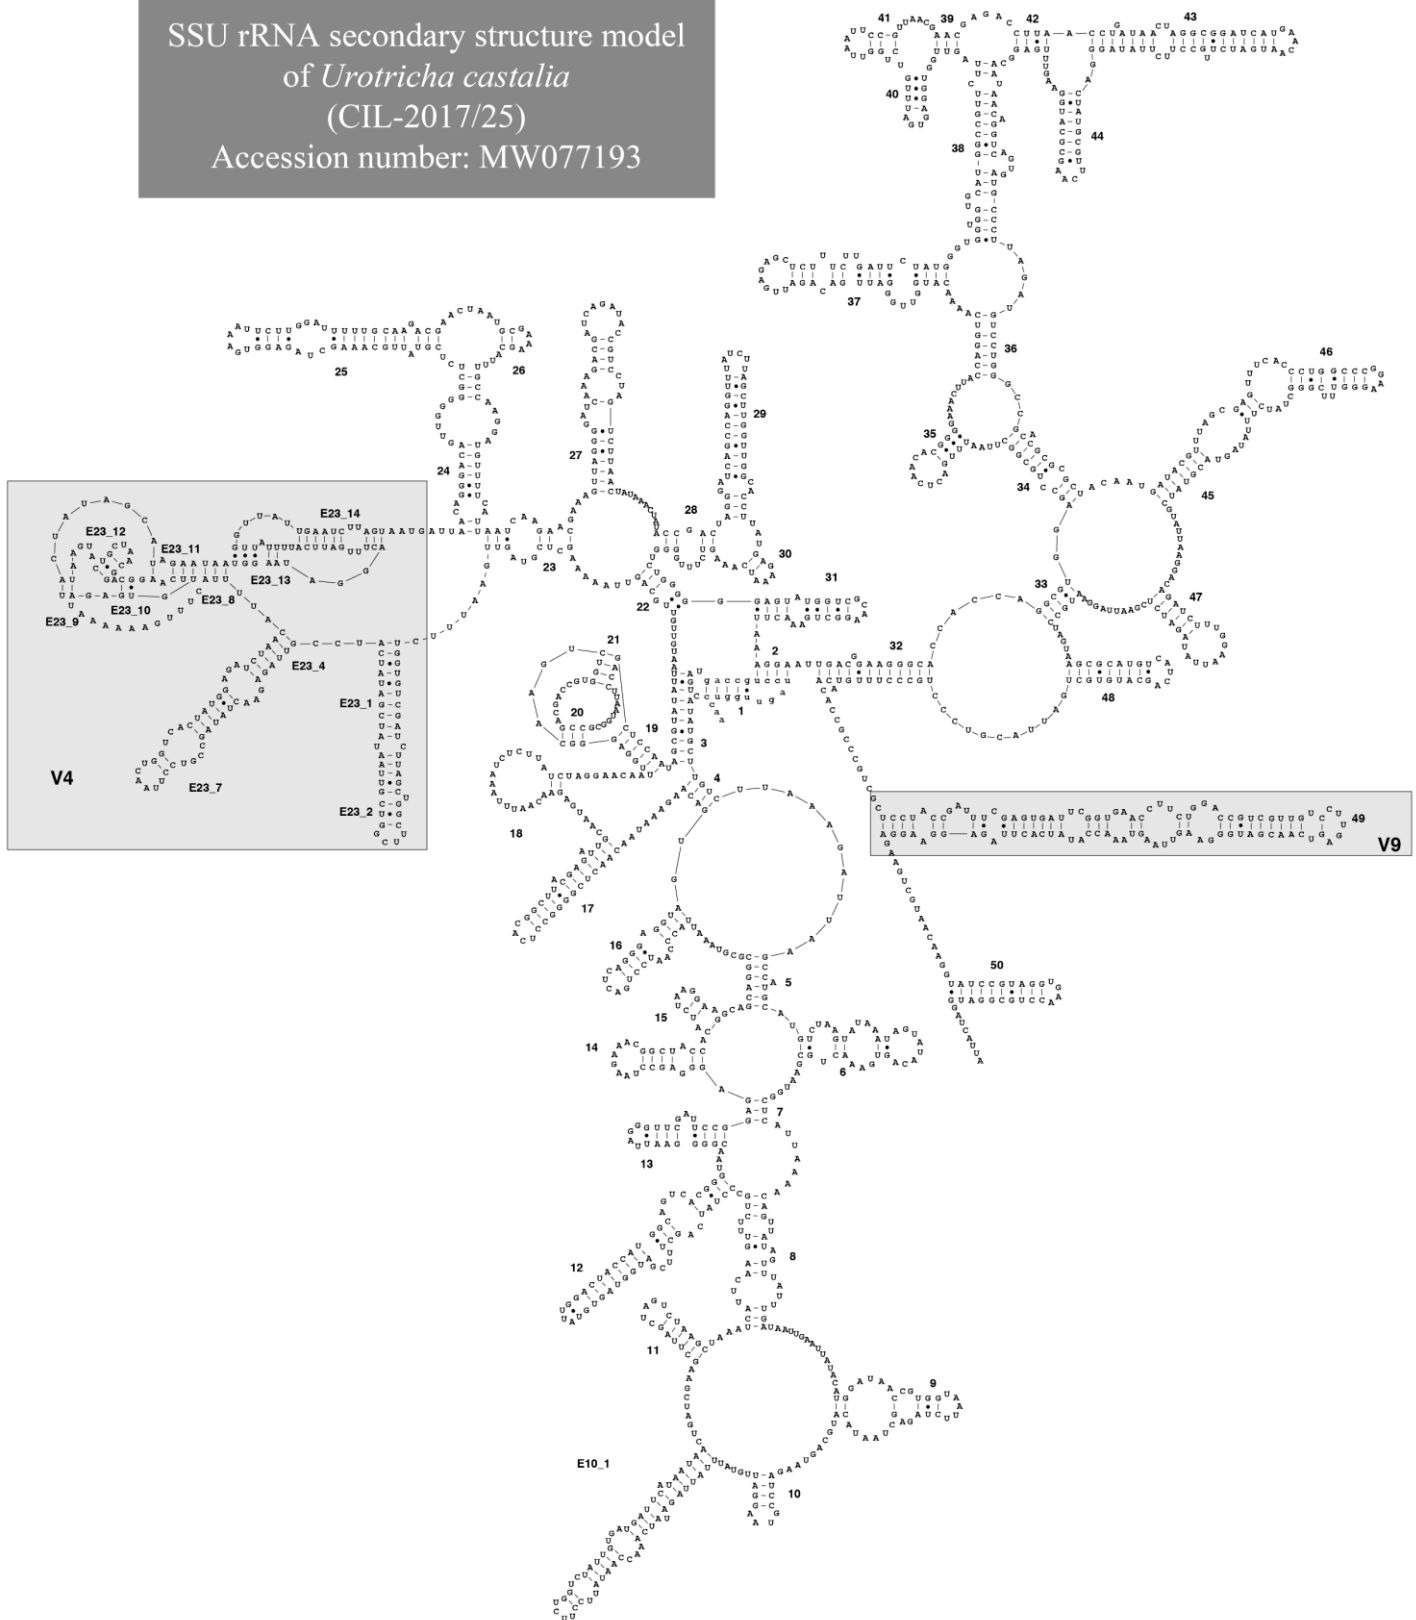

**Supplementary Figure 2** | Secondary structure of the SSU rRNA of *Urotricha castalia* (strain CIL-2017/25). The variable regions V4 and V9 are highlighted by gray boxes.

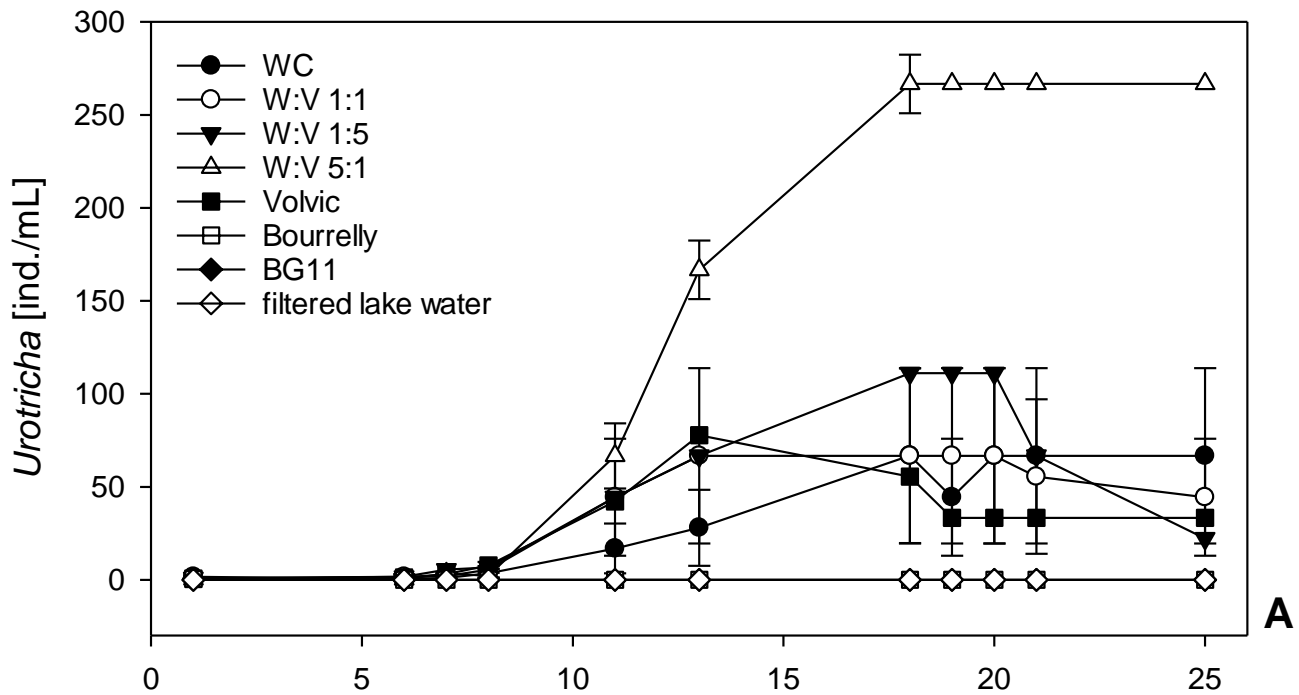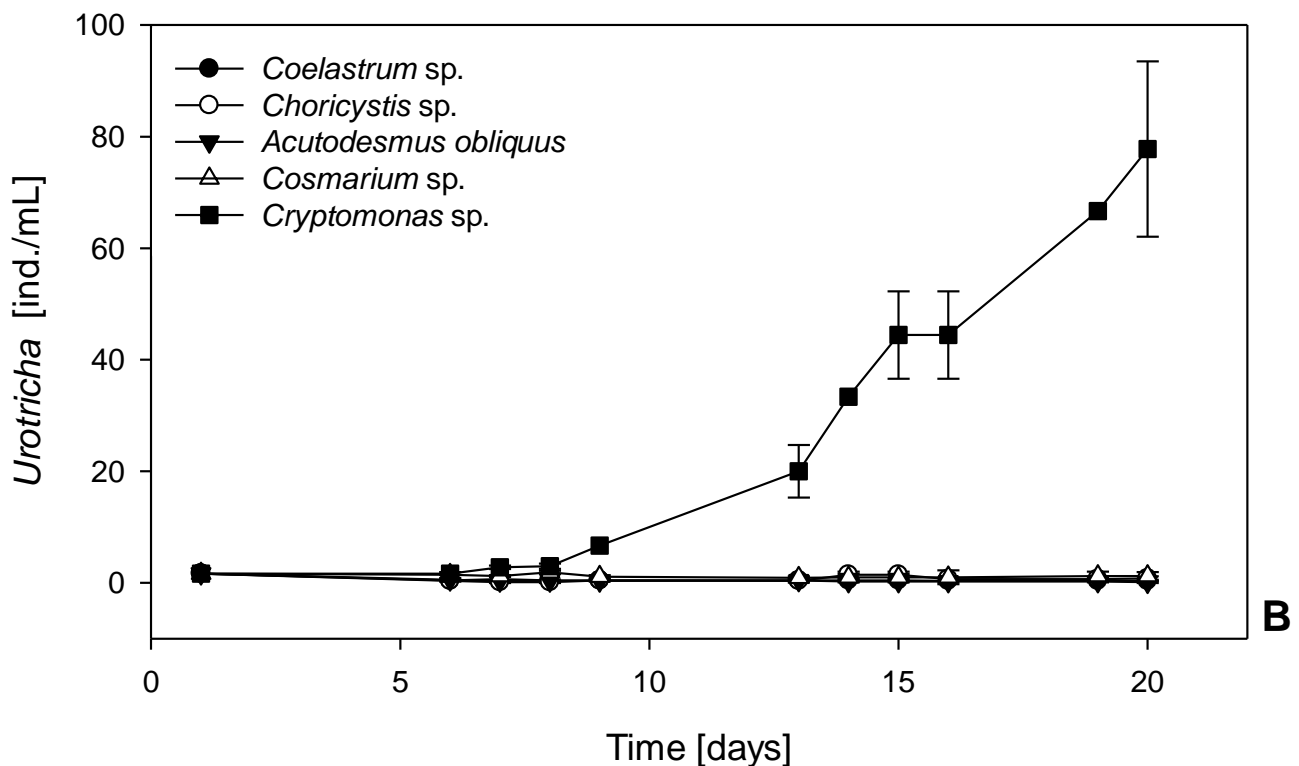

**Supplementary Figure 3** | Survival experiments with *Urotricha castalia* (strain CIL-2017/25) from Lake Mondsee, Austria. **(A)** Test of eight media plus SAG 26.80 *Cryptomonas* sp. as food source: Woods Hole MBL medium (WC), mixtures of WC:Volvic® mineral water (V) in 1:1, 1:5, 5:1 v/v; Volvic® mineral water only; modified Bourrelly medium; modified blue-green medium (BG11); sterile-filtered original lake water. **(B)** Test of five algal strains as food source in WC:V 5:1 v/v: MS-2017/1 *Coelastrum* sp., MS-2017/2 *Choricystis* sp., MS-2017/7 *Acutodesmus obliquus*, MS-2017/8 *Cosmarium* sp., and SAG 26.80 *Cryptomonas* sp.

V9 region of the SSU (Helix 49)

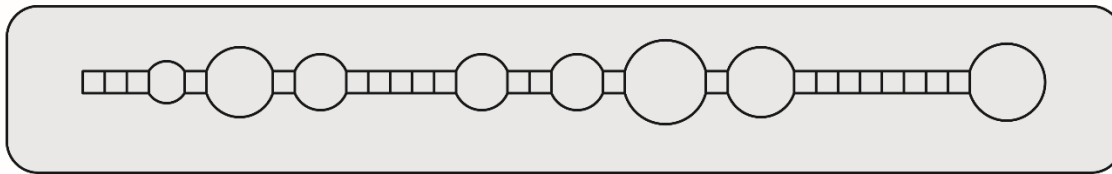

|      |     |    |        |     |      |     |   |              |
|------|-----|----|--------|-----|------|-----|---|--------------|
| A    | GAU | CG | UC     | GA  | CUU- | GGA |   | CU           |
| UCCU | CC  | UU | AGUGAU | GGU | AC   | CU  | C | UGUACAGGUC \ |
|      |     | •  |        |     |      |     |   | •••        C |
| AGGA | GG  | AG | UCACUA | CCA | UG   | GA  | G | GUGUGUCCAG / |
| A    | --- | AU | UA     | AA  | AAUU | AG- |   | AG           |
| A    | GAU | CG | UC     | GA  | CUU- | GGA |   | UCCU         |
| UCCU | CC  | UU | AGUGAU | GGU | AC   | CU  | C | UACCUAAG \   |
|      |     | •  |        |     |      |     |   | •        U   |
| AGGA | GG  | AG | UCACUA | CCA | UG   | GA  | G | GUGGAUUC /   |
| A    | --- | AU | UA     | AA  | AAUU | AG- |   | UGAG         |
| A    | GAU | CG | UC     | GA  | CUU- | GGA |   | UCCU         |
| UCCU | CC  | UU | AGUGAU | GGU | AC   | CU  | C | CGUCGUUG \   |
|      |     | •  |        |     |      |     |   | •       C    |
| AGGA | GG  | AG | UCACUA | CCA | UG   | GA  | G | GUAGCAAC /   |
| A    | --- | AU | UA     | AA  | AAUU | AG- |   | UGAG         |
| A    | GAU | CG | UC     | GA  | CUU- | GGA |   | CU           |
| UCCU | CC  | UU | AGUGAU | GGU | AC   | CU  | C | CGUACAGAGC \ |
|      |     | •  |        |     |      |     |   | ••      •  U |
| AGGA | GG  | AG | UCACUA | CCA | UG   | GA  | G | GUGUGUCUUG / |
| A    | --- | AU | UA     | AA  | AAUU | AG- |   | AG           |
| A    | GAU | CG | UC     | GA  | CUU- | GGA |   | UCCU         |
| UCCU | CC  | UU | AGUGAU | GGU | AC   | CU  | C | CGUGCAGA \   |
|      |     | •  |        |     |      |     |   | ••       U   |
| AGGA | GG  | AG | UCACUA | CCA | UG   | GA  | G | GUGCGUCU /   |
| A    | --- | AU | UA     | AA  | AAUU | AG- |   | UGAG         |

*U. agilis*

*U. furcata*  
*U. pseudofurcata*

*U. castalia*

*'Halodinium*  
*verrucatum'*  
(LC424401)

*'Plagiocampa*  
*sp.'*  
(KY980324)

**Supplementary Figure 4** | V9 secondary structures of the investigated *Urotricha* strains. The variable regions are marked by white boxes. The structures were calculated with mfold. The line graphic was drawn with PseudoViewer.



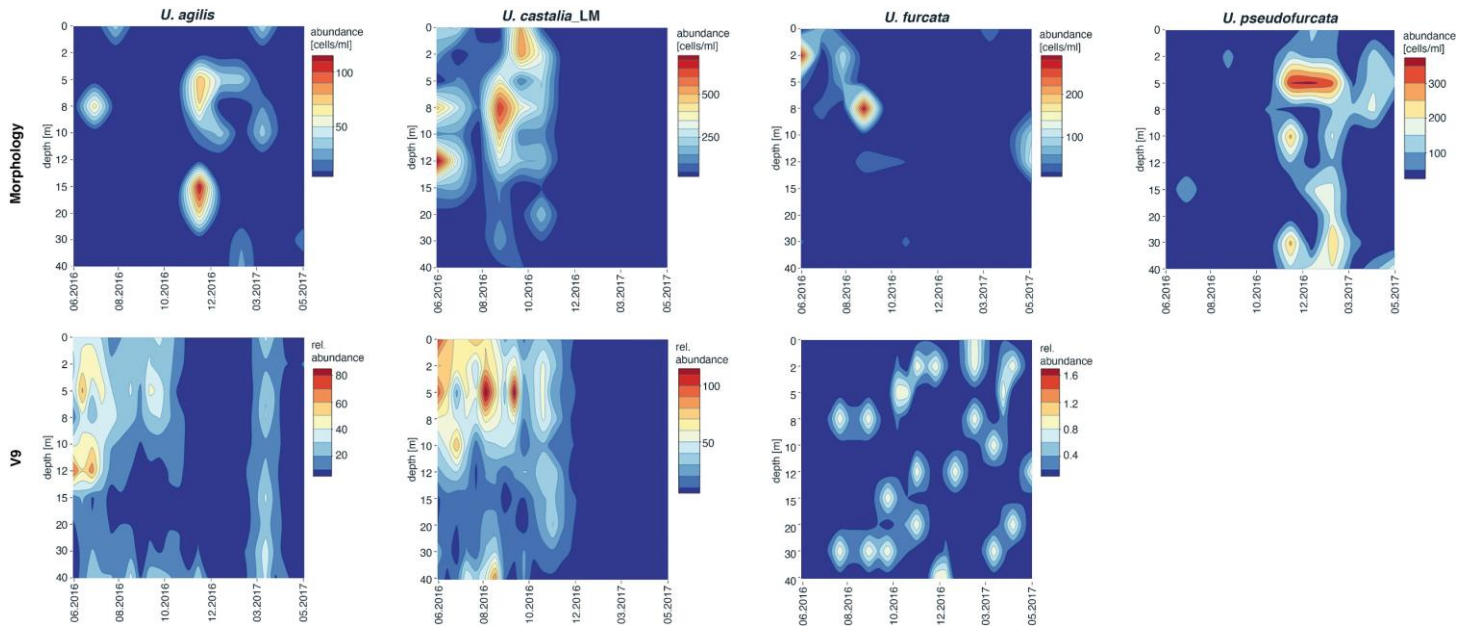

**Supplementary Figure 5** | Comparison of temporal and spatial distribution of *Urotricha* strains in Lake Mondsee between sequence data (V9 region) and morphology-based count data. Using the morphology-based approach, *U. agilis*, *U. castalia*, *U. furcata*, and *U. pseudofurcata* could be identified and counted. From the V9 dataset, only V9 markers from *U. agilis*, *U. castalia\_LM*, and *U. furcata/U. pseudofurcata* could be extracted and used for the comparison.

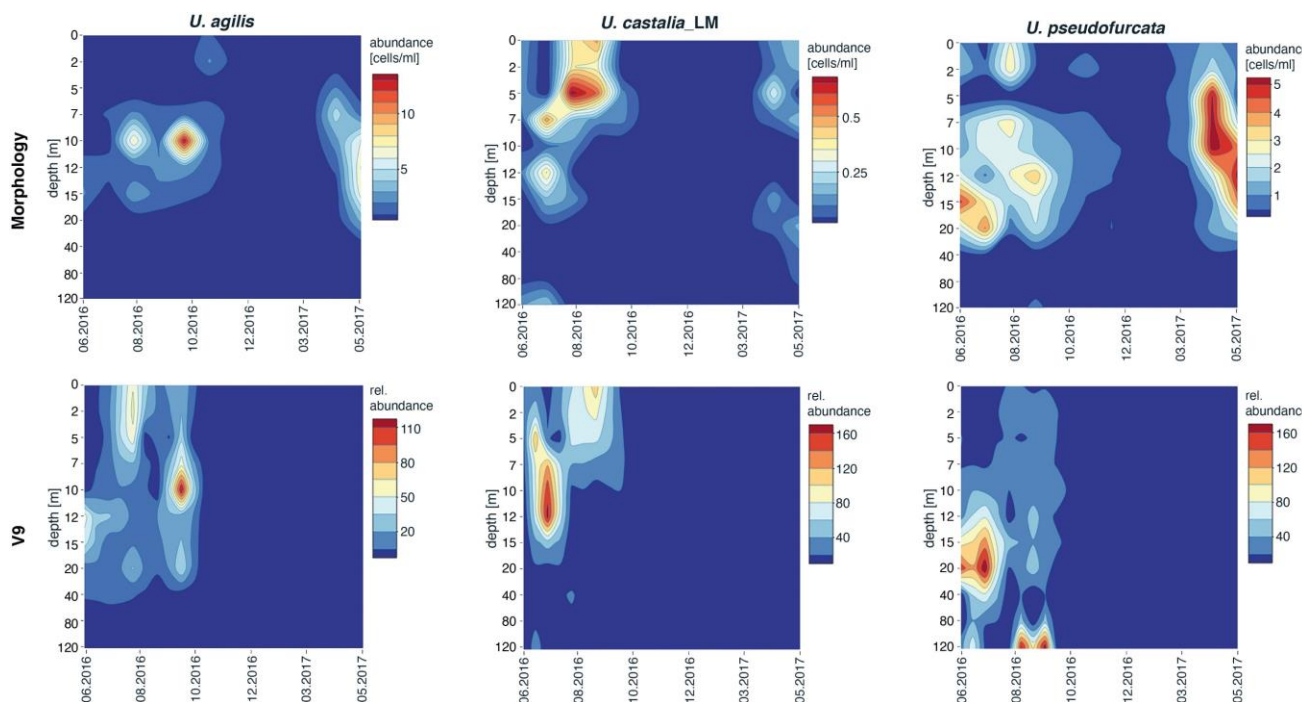

**Supplementary Figure 6** | Comparison of temporal and spatial distribution of *Urotricha* strains in Lake Zurich between sequence data (V9 region) and morphology-based count data. Using the morphology-based approach, *U. agilis*, *U. castalia* and *U. pseudofurcata* could be identified and counted. From the V9 dataset, only V9 markers from *U. agilis*, *U. castalia\_LM*, and *U. furcata/U. pseudofurcata* could be extracted and used for the comparison.

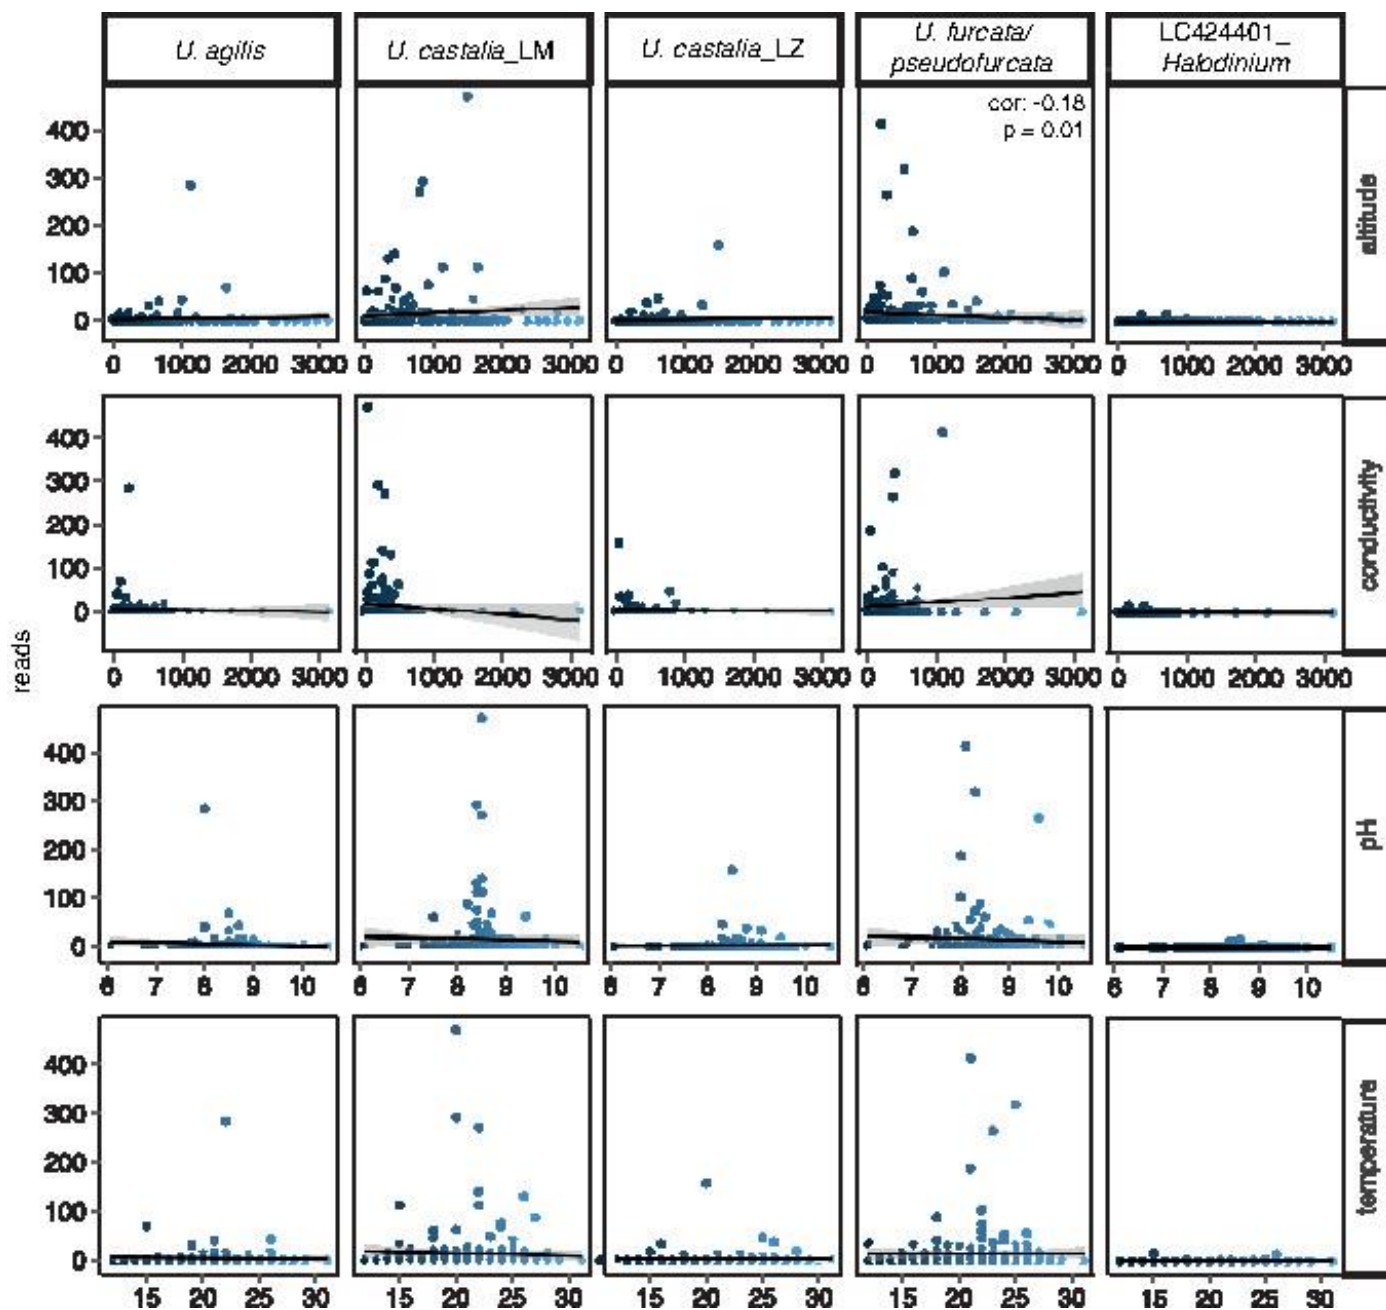

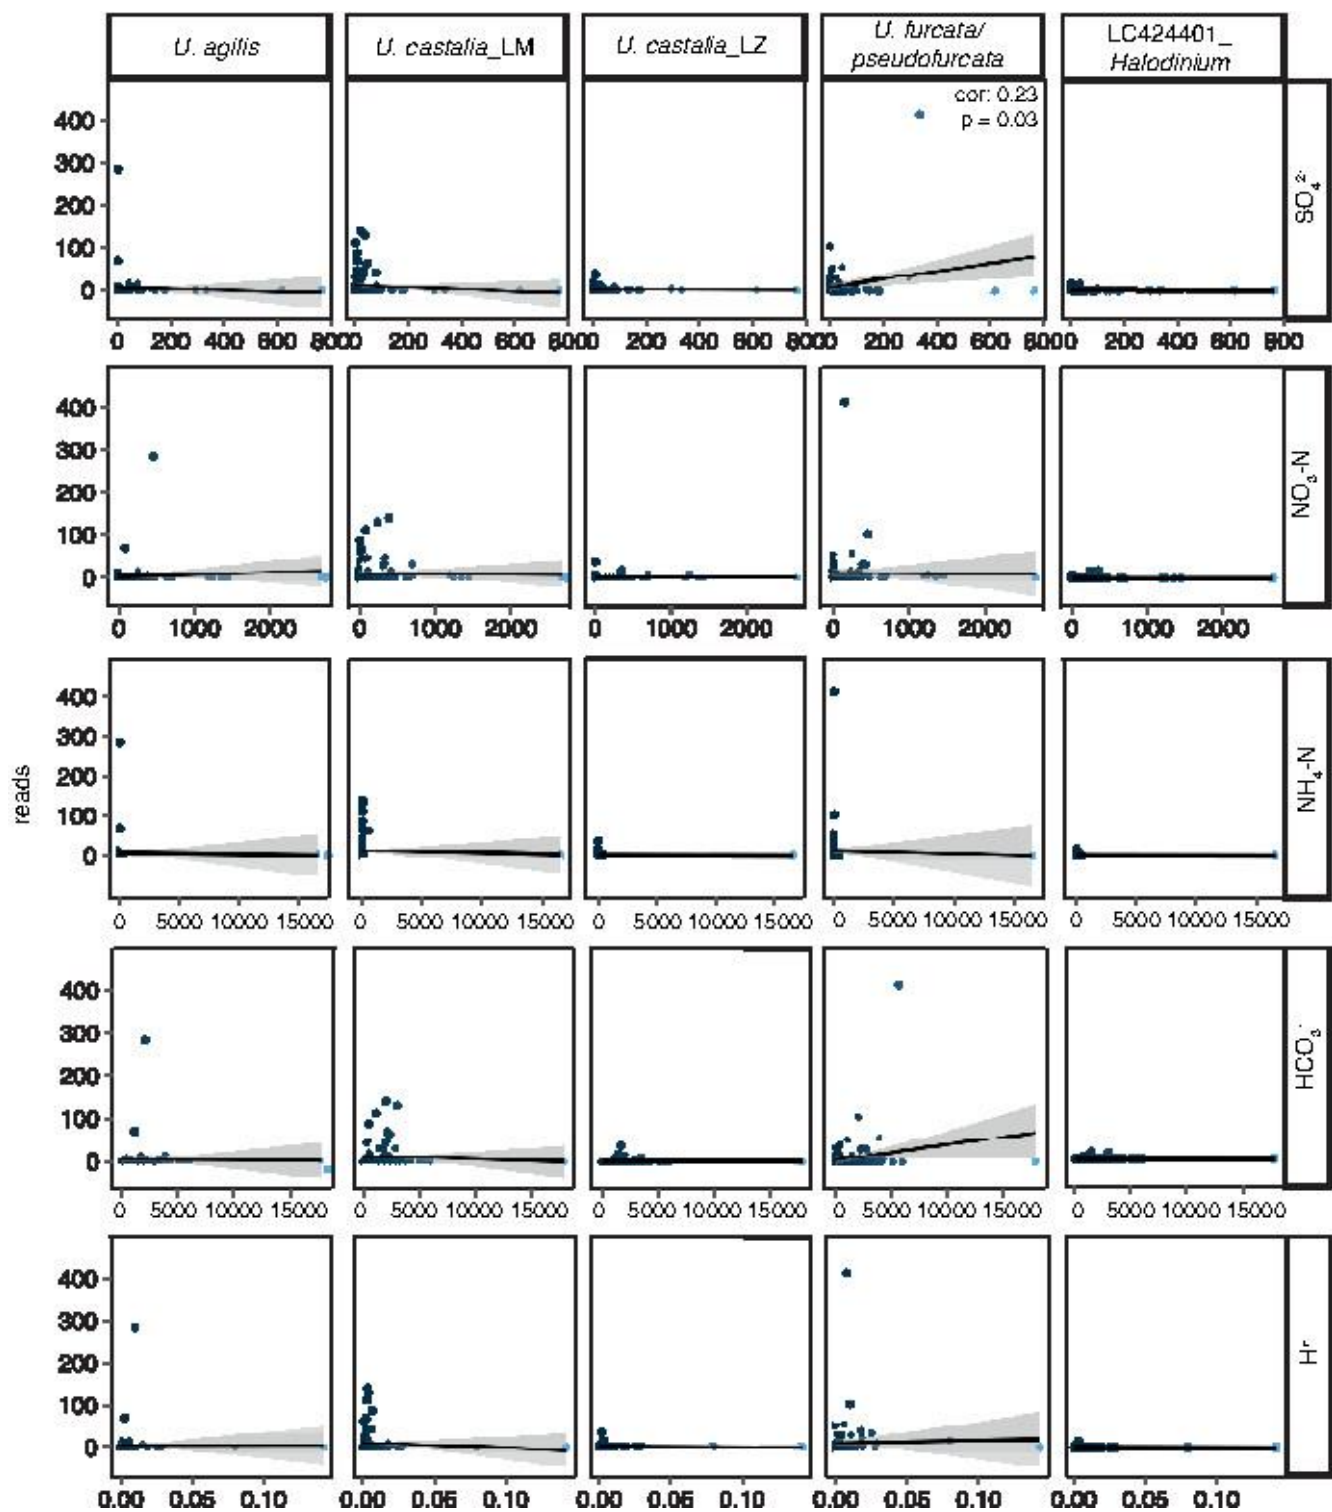

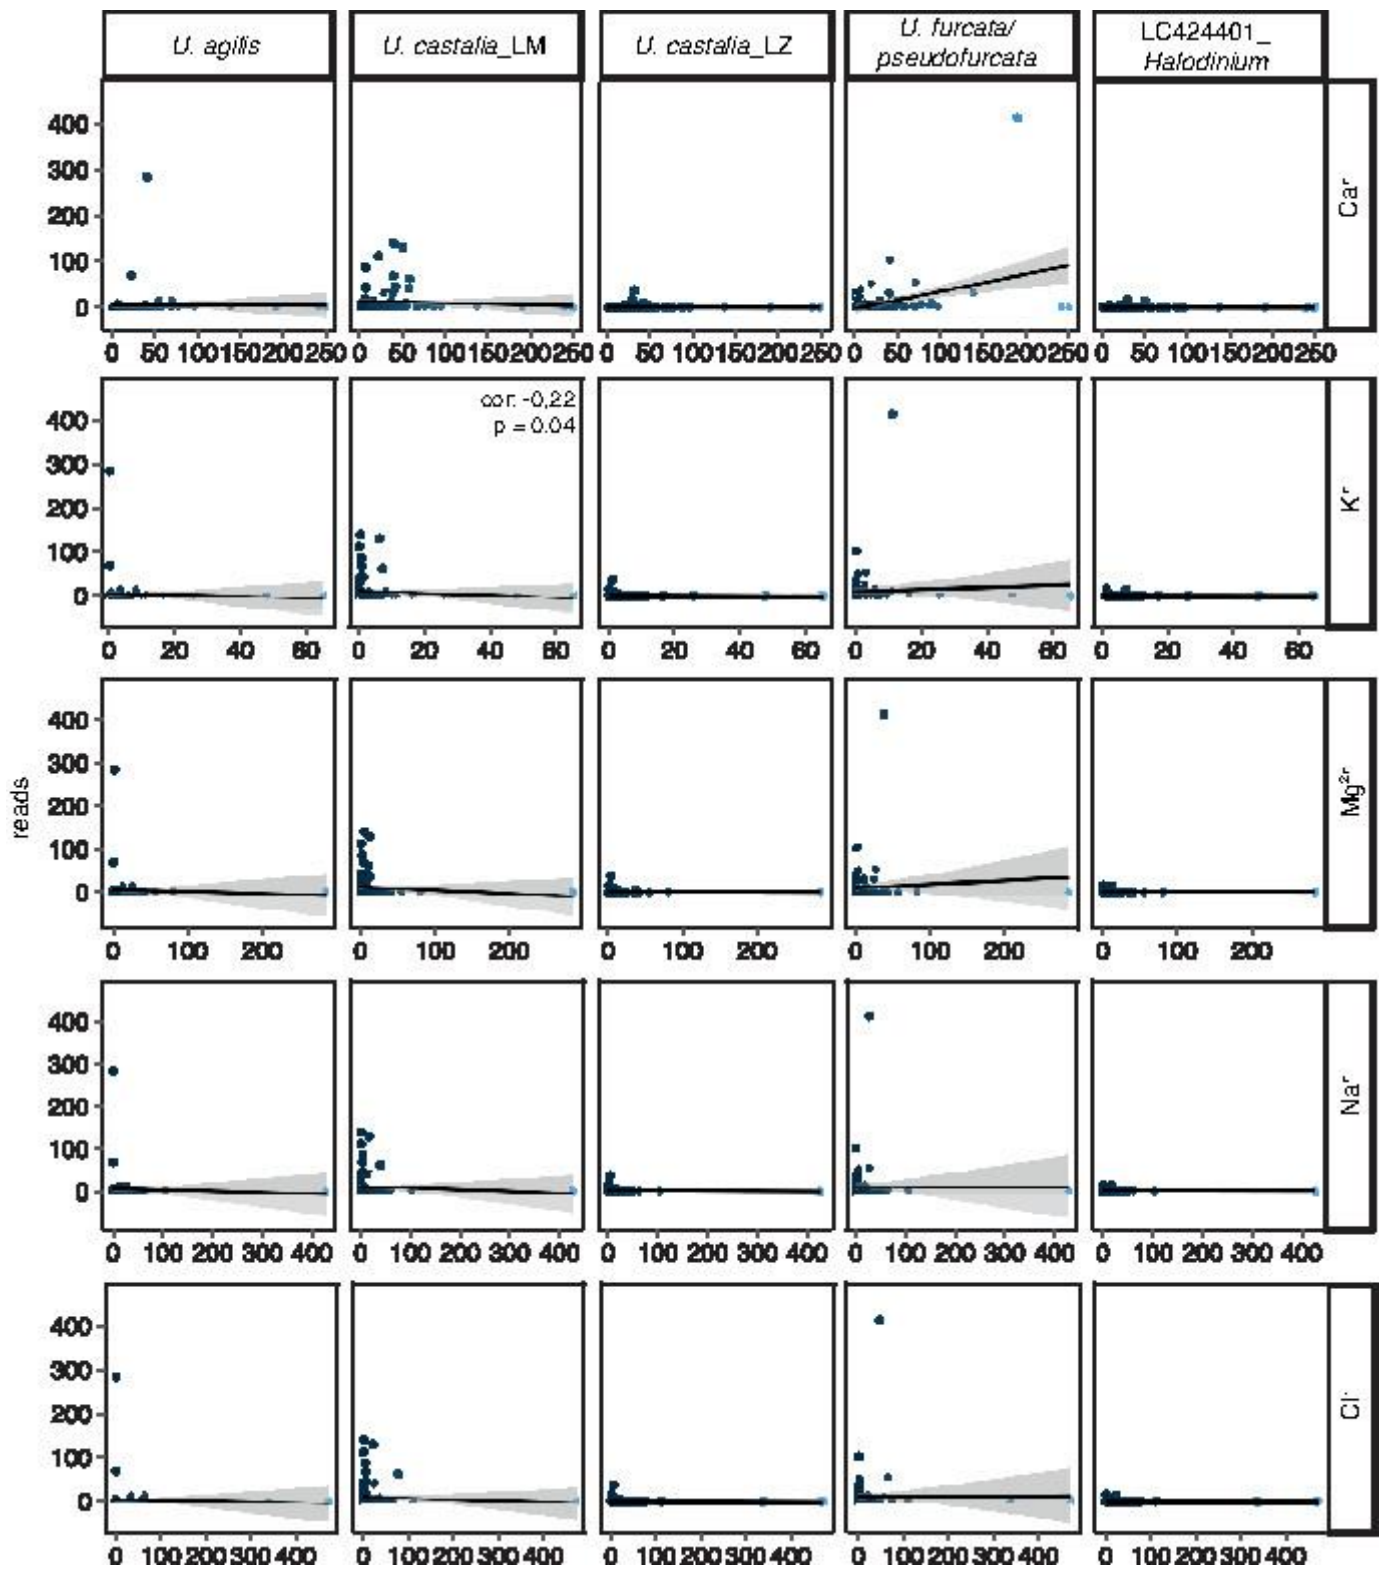



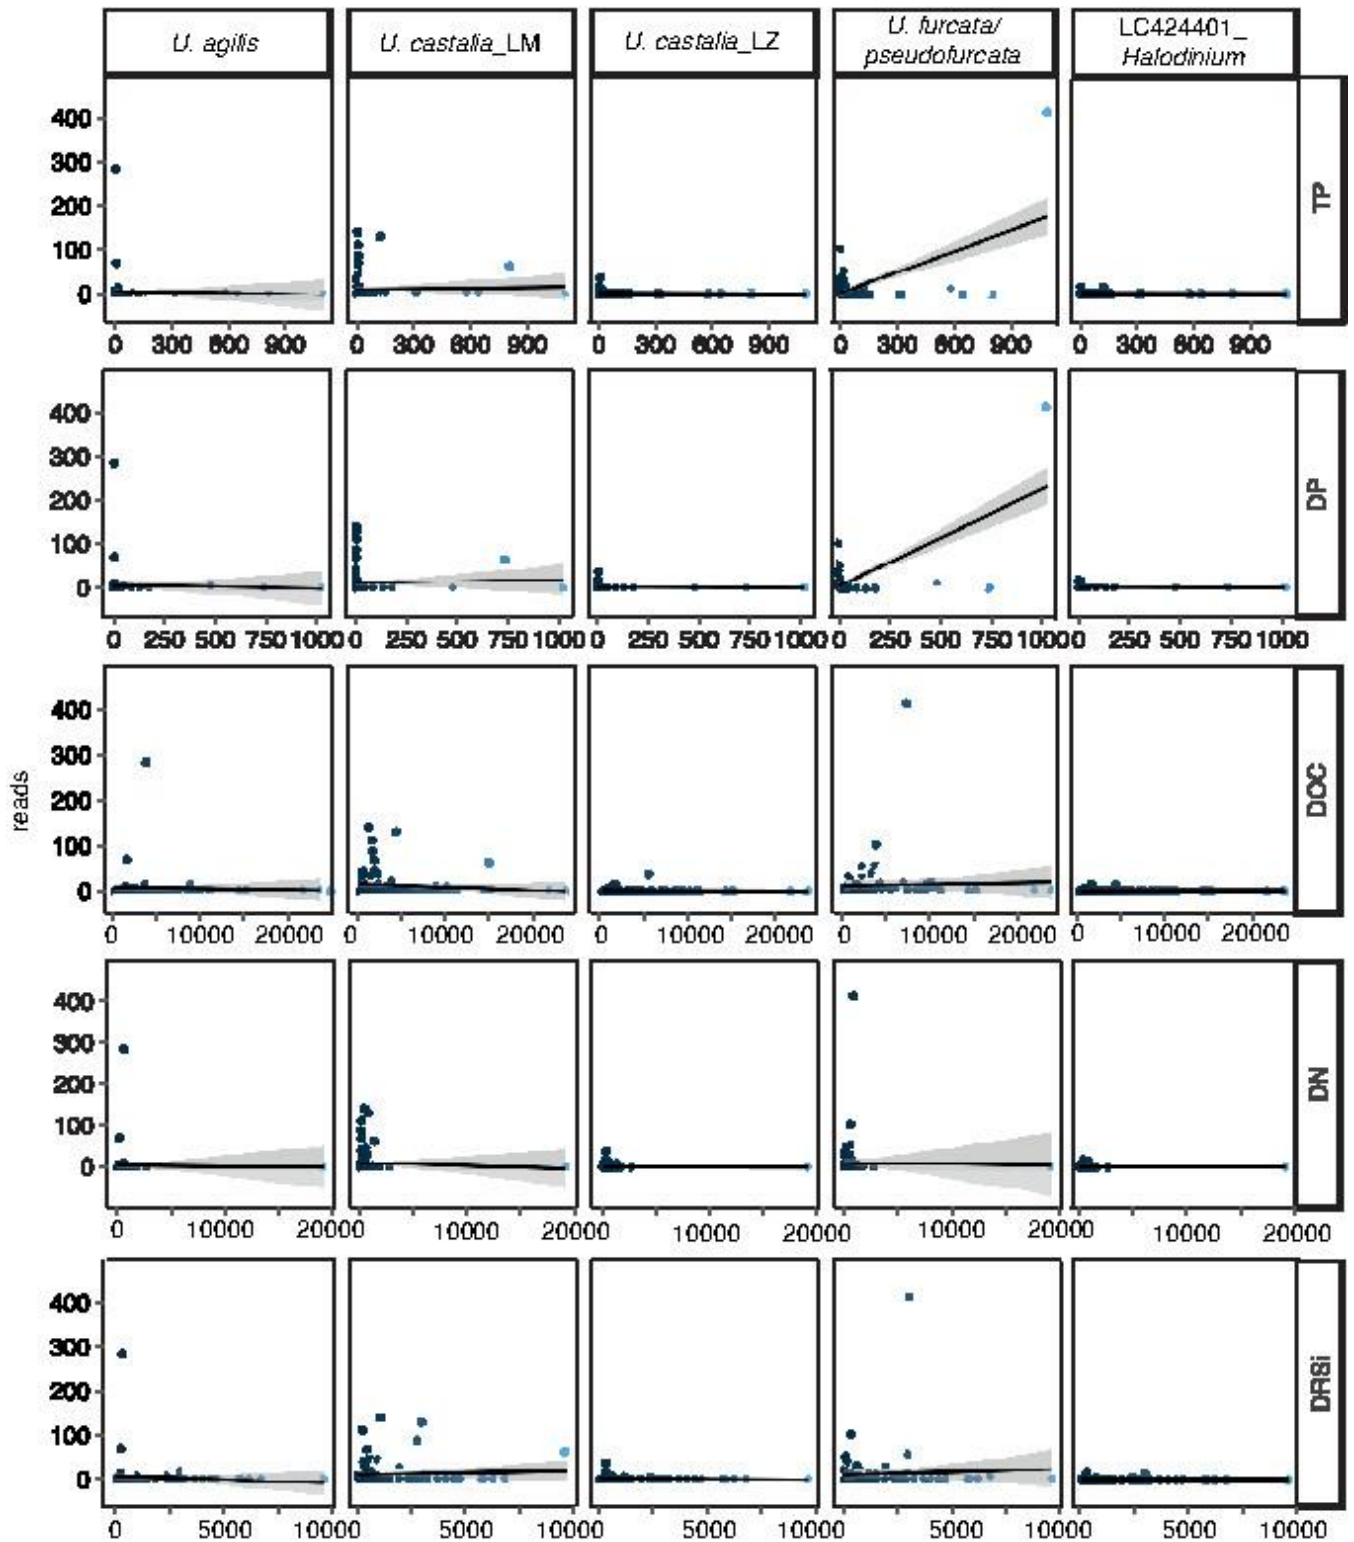

**Supplementary Figure 7** | Ecological preferences of the investigated ciliate strains. Read abundances were correlated with and plotted against different environmental parameters. The black lines are regression lines and the gray area indicates the 95%-confidence intervals. Correlations were considered significant when the  $p$ -value was  $<0.05$ .

**Supplementary Table 1** | Valid names of *Urotricha* species according to Aescht (2012). Doubtful species were excluded (for details, see Foissner and Pfister, 1997).

| Accepted name                                        | Possible synonym                                                            | Comments                                                                                                       | Caudal Cilia # | Habitat    |
|------------------------------------------------------|-----------------------------------------------------------------------------|----------------------------------------------------------------------------------------------------------------|----------------|------------|
| <i>Urotricha agilis</i> (Stokes, 1886) Kahl, 1930    | <i>Urotricha gyrans</i> (Stokes, 1887) Foissner, 1979                       |                                                                                                                | 1              | freshwater |
|                                                      | <i>Urotricha nais</i> Muñoz et al., 1987                                    |                                                                                                                | 1              | freshwater |
| <i>Urotricha baikalensis</i> Alekperov et al., 2012  |                                                                             |                                                                                                                | 1              | freshwater |
| <i>Urotricha corlissiana</i> Song and Wilbert, 1989  | <i>Urotricha platystoma</i> Stokes, 1886                                    |                                                                                                                | 1              | freshwater |
| <i>Urotricha discolor</i> Kahl, 1930                 |                                                                             |                                                                                                                | 1              | freshwater |
| <i>Urotricha dragescoi</i> Foissner, 1984            | <i>Urotricha armata</i> Kahl, 1927 sensu Dragesco et al., 1974              |                                                                                                                | 1              | freshwater |
| <i>Urotricha farcta</i> Claparède and Lachmann, 1859 | <i>Urotricha fareta</i> Claparède and Lachmann, 1859 (misspelling)          |                                                                                                                | 1              | freshwater |
|                                                      | <i>Urotricha gyrans</i> (Stokes, 1887) Foissner, 1979                       |                                                                                                                | 1              | freshwater |
|                                                      | <i>Urotricha minkewicki</i> Schouteden, 1906                                |                                                                                                                | 1              | freshwater |
|                                                      | <i>Urotricha minkewickzi</i> Schouteden, 1906 (misspelling)                 |                                                                                                                | 1              | freshwater |
|                                                      | <i>Urotricha parvula</i> Penard, 1922                                       |                                                                                                                | 1              | freshwater |
| <i>Urotricha globosa</i> Schewiakoff, 1892           |                                                                             |                                                                                                                | 1              | freshwater |
| <i>Urotricha gracilis</i> Penard, 1922               |                                                                             |                                                                                                                | 1              | freshwater |
| <i>Urotricha lagenula</i> Ehrenberg-Kent, 1881       |                                                                             |                                                                                                                | 1              | freshwater |
| <i>Urotricha lemani</i> Foissner et al., 1994        | <i>Urotricha armata</i> Dragesco, 1960                                      | <i>Urotricha lemani</i> is the replacement name for the junior primary homonym <i>U. armata</i> Dragesco, 1960 | 1              | freshwater |
| <i>Urotricha nais</i> Muñoz et al., 1987             | Probably synonym of <i>Urotricha agilis</i> (Stokes, 1886) Kahl, 1930       |                                                                                                                | 1              | freshwater |
| <i>Urotricha ondina</i> Muñoz et al., 1989           |                                                                             |                                                                                                                | 1              | freshwater |
| <i>Urotricha ovata</i> Kahl, 1926                    | Possibly, a synonym of <i>Urotricha farcta</i> Claparède and Lachmann, 1859 |                                                                                                                | 1              | freshwater |
| <i>Urotricha platystoma</i> Stokes, 1886             | <i>Urotricha armata</i> , Kahl, 1927                                        |                                                                                                                | 1              | freshwater |
|                                                      | <i>Urotricha corlissiana</i> Song and Wilbert, 1989                         |                                                                                                                | 1              | freshwater |
| <i>Urotricha psenneri</i> Sonntag and Foissner, 2004 |                                                                             |                                                                                                                | 1              | freshwater |

|                                                                   |                                                                 |                                                                                                   |               |                  |
|-------------------------------------------------------------------|-----------------------------------------------------------------|---------------------------------------------------------------------------------------------------|---------------|------------------|
| <i>Urotricha pusilla</i> Penard, 1922                             |                                                                 | Kahl (1930) doubted that this species was an <i>Urotricha</i>                                     | 1             | freshwater       |
| <i>Urotricha risto</i> i Krainer, 1995                            |                                                                 |                                                                                                   | 1             | freshwater       |
| <i>Urotricha sphaerica</i> Grolière, 1977                         |                                                                 |                                                                                                   | 1             | freshwater       |
| <i>Urotricha synuraphaga</i> Kahl, 1927                           |                                                                 |                                                                                                   | 1             | freshwater       |
| <i>Urotricha vitrea</i> Martín-Gonzalez et al., 1985              |                                                                 |                                                                                                   | 1             | freshwater       |
| <i>Urotricha furcata</i> Schewiakoff, 1892                        |                                                                 |                                                                                                   | 2             | freshwater       |
| <i>Urotricha macrostoma</i> Foissner, 1983                        |                                                                 |                                                                                                   | 2             | freshwater       |
| <i>Urotricha pseudofurcata</i> Krainer, 1995                      |                                                                 |                                                                                                   | 2             | freshwater       |
| <i>Urotricha cyrtotonucleata</i> Martin and Montagnes, 1993       |                                                                 |                                                                                                   | 3             | marine, brackish |
| <i>Urotricha spetai</i> Foissner, 2012                            |                                                                 |                                                                                                   | 4             | freshwater       |
| <i>Urotricha matthesi matthesi</i> Krainer, 1995                  | <i>Urotricha matthesi</i> , Krainer, 1995                       |                                                                                                   | 3-4           | freshwater       |
| <i>Urotricha matthesi tristicha</i> Foissner and Pfister, 1997    |                                                                 |                                                                                                   | 4-5           | freshwater       |
| <i>Urotricha tricha</i> Wang and Nie, 1933                        |                                                                 |                                                                                                   | 4, rarely 5-6 | freshwater       |
| <i>Urotricha castalia</i> Muñoz et al., 1987                      | <i>Urotricha rotunda</i> , Fernandez-Leborans and Novillo, 1994 |                                                                                                   | 4-9           | freshwater       |
| <i>Urotricha antarctica</i> Wilbert and Song, 2008                |                                                                 |                                                                                                   | ca. 6         | marine, brackish |
| <i>Urotricha multisetosa</i> Wang & Nie, 1933                     | <i>Urotricha faurei</i> Dragesco et al., 1974                   |                                                                                                   | At least 10   | freshwater       |
| <i>Urotricha apsheronica</i> Alekperov, 1984                      |                                                                 |                                                                                                   | 12-16         | freshwater       |
| <i>Urotricha pelagica</i> Kahl, 1935                              |                                                                 | Redescribed by Foissner and Pfister (1997) who mentioned high similarity to <i>U. apsheronica</i> | 14-18         | freshwater       |
| <i>Urotricha terricola</i> Alekperov and Musayev, 1988            |                                                                 | Redescription required according to Foissner and Pfister (1997)                                   | 16            | soil             |
| <i>Urotricha simonsbergeri</i> Foissner et al., 1999              |                                                                 |                                                                                                   | ca. 25        | freshwater       |
| <i>Urotricha venatrix</i> (Kahl, 1935) Foissner and Pfister, 1997 |                                                                 |                                                                                                   | 27-35         | freshwater       |





|                                            |             |      |     |     |     |      |      |      |     |    |
|--------------------------------------------|-------------|------|-----|-----|-----|------|------|------|-----|----|
| Unciliated<br>posterior portion,<br>length | CIL-2019/10 | P    | 2.3 | 2.0 | 0.8 | 0.2  | 35.9 | 0.5  | 4.0 | 21 |
|                                            |             | IV   | -   | -   | -   | -    | -    | -    | -   | -  |
|                                            | CIL-2019/13 | P    | 2.3 | 2.0 | 0.4 | 0.1  | 17.3 | 1.8  | 3.0 | 21 |
|                                            |             | IV   | -   | -   | -   | -    | -    | -    | -   | -  |
|                                            | CIL-2019/6  | P    | 1.0 | 1.0 | 0.5 | 0.1  | 51.6 | 0.0  | 1.5 | 21 |
|                                            |             | IV   | -   | -   | -   | -    | -    | -    | -   | -  |
|                                            | CIL-2019/3  | P    | 1.2 | 1.0 | 1.3 | 0.1  | 24.7 | 1.0  | 2.0 | 21 |
|                                            |             | IV   | -   | -   | -   | -    | -    | -    | -   | -  |
|                                            | CIL-2017/25 | P    | 0.6 | 0.5 | 0.4 | 0.1  | 61.0 | 0.1  | 1.0 | 21 |
|                                            |             | IV   | -   | -   | -   | -    | -    | -    | -   | -  |
|                                            | CIL-2017/27 | P    | 0.8 | 1.0 | 0.3 | 0.1  | 36.0 | 0.3  | 1.0 | 7  |
|                                            |             | IV   | -   | -   | -   | -    | -    | -    | -   | -  |
|                                            | CIL-2019/1  | P    | 1.0 | 1.0 | 0.3 | 0.1  | 34.8 | 0.5  | 2.0 | 21 |
|                                            |             | IV   | -   | -   | -   | -    | -    | -    | -   | -  |
|                                            | CIL-2017/24 | P    | 3.5 | 3.4 | 0.8 | 0.2  | 23.1 | 2.5  | 5.7 | 21 |
|                                            |             | IV   | -   | -   | -   | -    | -    | -    | -   | -  |
|                                            | CIL-2019/10 | P    | 4.2 | 4.0 | 0.6 | 0.1  | 13.3 | 3.0  | 5.0 | 19 |
|                                            |             | IV   | -   | -   | -   | -    | -    | -    | -   | -  |
|                                            | CIL-2019/13 | P    | 3.4 | 3.5 | 0.6 | 0.1  | 18.3 | 2.3  | 4.4 | 21 |
|                                            |             | IV   | -   | -   | -   | -    | -    | -    | -   | -  |
|                                            | CIL-2019/6  | P    | 3.5 | 3.2 | 1.5 | 0.3  | 42.3 | 1.0  | 9.0 | 21 |
| IV                                         |             | 10.1 | 9.1 | 2.5 | 0.5 | 24.9 | 6.8  | 15.0 | 21  |    |
| CIL-2017/25                                | P           | 4.2  | 4.3 | 0.8 | 0.2 | 18.1 | 3.0  | 5.7  | 21  |    |
|                                            | IV          | -    | -   | -   | -   | -    | -    | -    | -   |    |
| CIL-2017/27                                | P           | 4.1  | 3.9 | 1.0 | 0.2 | 25.2 | 2.4  | 6.4  | 21  |    |
|                                            | IV          | -    | -   | -   | -   | -    | -    | -    | -   |    |
| CIL-2019/1                                 | P           | 6.1  | 6.3 | 1.5 | 0.4 | 24.0 | 3.4  | 9.3  | 11  |    |
|                                            | IV          | 9.0  | 8.7 | 1.7 | 0.4 | 19.3 | 6.3  | 12.1 | 21  |    |
| CIL-2017/24                                | P           | 7.3  | 7.4 | 1.4 | 0.3 | 18.9 | 5.2  | 9.7  | 21  |    |
|                                            | IV          | 6.8  | 6.8 | 1.0 | 0.2 | 15.3 | 4.8  | 8.7  | 21  |    |
| CIL-2019/10                                | P           | 7.0  | 7.0 | 0.7 | 0.1 | 9.7  | 6.0  | 8.5  | 21  |    |
|                                            | IV          | 7.9  | 7.7 | 1.3 | 0.3 | 15.9 | 5.5  | 10.8 | 21  |    |
| CIL-2019/13                                | P           | 6.0  | 5.9 | 1.1 | 0.2 | 19.1 | 4.0  | 8.0  | 21  |    |
|                                            | IV          | 6.4  | 6.3 | 1.1 | 0.2 | 16.5 | 4.8  | 8.8  | 21  |    |
| CIL-2019/6                                 | P           | 6.1  | 5.7 | 1.2 | 0.3 | 19.9 | 4.5  | 8.7  | 21  |    |
|                                            | IV          | 9.4  | 9.3 | 1.1 | 0.2 | 12.0 | 7.3  | 12.6 | 21  |    |
| CIL-2017/25                                | P           | 5.9  | 6.0 | 1.1 | 0.2 | 19.4 | 3.1  | 8.5  | 21  |    |
|                                            | IV          | 8.4  | 8.6 | 0.9 | 0.2 | 10.7 | 6.7  | 9.8  | 21  |    |
| CIL-2017/27                                | P           | 6.4  | 6.7 | 1.1 | 0.2 | 16.6 | 4.6  | 8.3  | 21  |    |
|                                            | IV          | 8.0  | 8.3 | 1.5 | 0.3 | 19.2 | 4.3  | 10.7 | 21  |    |
| CIL-2019/1                                 | P           | 5.9  | 5.1 | 1.6 | 0.3 | 27.3 | 4.4  | 10.6 | 21  |    |
|                                            | IV          | 1.0  | 1.0 | 0.0 | 0.0 | 0.0  | 1.0  | 1.0  | 21  |    |
| CIL-2017/24                                | P           | 1.0  | 1.0 | 0.0 | 0.0 | 0.0  | 1.0  | 1.0  | 21  |    |
|                                            | IV          | 1.0  | 1.0 | 0.0 | 0.0 | 0.0  | 1.0  | 1.0  | 21  |    |
| CIL-2019/10                                | P           | 1.0  | 1.0 | 0.0 | 0.0 | 0.0  | 1.0  | 1.0  | 21  |    |
|                                            | IV          | 2.0  | 2.0 | 0.0 | 0.0 | 0.0  | 2.0  | 2.0  | 21  |    |
| CIL-2019/13                                | P           | 2.0  | 2.0 | 0.0 | 0.0 | 0.0  | 2.0  | 2.0  | 21  |    |
|                                            | IV          | 2.0  | 2.0 | 0.0 | 0.0 | 0.0  | 2.0  | 2.0  | 21  |    |
| CIL-2019/6                                 | P           | 2.0  | 2.0 | 0.0 | 0.0 | 0.0  | 2.0  | 2.0  | 21  |    |
|                                            | IV          | 2.0  | 2.0 | 0.0 | 0.0 | 0.0  | 2.0  | 2.0  | 21  |    |
| CIL-2019/3                                 | P           | 2.0  | 2.0 | 0.0 | 0.0 | 0.0  | 2.0  | 2.0  | 21  |    |
|                                            | IV          | 4.5  | 4.0 | 0.8 | 0.2 | 18.2 | 4.0  | 7.0  | 21  |    |
| CIL-2017/25                                | P           | 5.1  | 5.0 | 1.0 | 0.2 | 19.5 | 4.0  | 7.0  | 21  |    |
|                                            | IV          | 4.4  | 4.0 | 0.8 | 0.2 | 18.3 | 4.0  | 7.0  | 21  |    |
| CIL-2017/27                                | P           | 6.0  | 6.0 | 1.1 | 0.2 | 18.0 | 4.0  | 7.0  | 21  |    |
|                                            | IV          | 4.7  | 4.0 | 0.9 | 0.2 | 19.6 | 4.0  | 7.0  | 21  |    |



|                                             |             |       |     |     |     |     |      |     |     |    |
|---------------------------------------------|-------------|-------|-----|-----|-----|-----|------|-----|-----|----|
|                                             |             | P     | 2.0 | 2.0 | 0.2 | 0.0 | 11.2 | 1.5 | 2.5 | 21 |
|                                             | CIL-2017/25 | IV    | -   | -   | -   | -   | -    | -   | -   | -  |
|                                             |             | P     | 1.9 | 2.0 | 0.2 | 0.0 | 11.6 | 1.5 | 2.0 | 21 |
|                                             | CIL-2017/27 | IV    | -   | -   | -   | -   | -    | -   | -   | -  |
|                                             |             | P     | 2.0 | -   | 0.3 | 0.1 | 16.5 | 1.2 | 2.5 | 14 |
|                                             | CIL-2019/1  | IV    | -   | -   | -   | -   | -    | -   | -   | -  |
|                                             | + CIL-48    | P+QPS | 2.4 | -   | 0.4 | 0.1 | 17.8 | 2.0 | 3.0 | 14 |
| Adoral organelle 2,<br>length               | CIL-2017/24 | IV    | -   | -   | -   | -   | -    | -   | -   | -  |
|                                             |             | P     | 0.9 | -   | 0.1 | 0.0 | 12.2 | 0.8 | 1.2 | 18 |
|                                             | CIL-2019/10 | IV    | -   | -   | -   | -   | -    | -   | -   | -  |
|                                             |             | P     | 1.0 | 1.0 | 0.0 | 0.0 | 0.0  | 1.0 | 1.0 | 5  |
|                                             | CIL-2019/13 | IV    | -   | -   | -   | -   | -    | -   | -   | -  |
|                                             | CIL-2019/6  | P     | 1.1 | -   | 0.2 | 0.1 | 21.3 | 0.8 | 1.5 | 10 |
|                                             | CIL-2019/3  | IV    | -   | -   | -   | -   | -    | -   | -   | -  |
|                                             |             | P     | 1.4 | 1.5 | 0.2 | 0.1 | 13.2 | 1.0 | 1.5 | 7  |
|                                             | CIL-2017/25 | IV    | -   | -   | -   | -   | -    | -   | -   | -  |
|                                             |             | P     | 1.5 | 1.5 | 0.2 | 0.0 | 14.6 | 1.2 | 2.0 | 21 |
|                                             | CIL-2017/27 | IV    | -   | -   | -   | -   | -    | -   | -   | -  |
|                                             |             | P     | 1.3 | 1.2 | 0.3 | 0.1 | 23.5 | 1.0 | 2.0 | 9  |
|                                             | CIL-2019/1  | IV    | -   | -   | -   | -   | -    | -   | -   | -  |
|                                             | + CIL-48    | P+QPS | 1.7 | -   | 0.3 | 0.1 | 18.8 | 1.0 | 2.0 | 14 |
| Adoral organelle 3,<br>length               | CIL-2017/24 | IV    | -   | -   | -   | -   | -    | -   | -   | -  |
|                                             |             | P     | 0.9 | -   | 0.1 | 0.0 | 10.7 | 0.8 | 1.0 | 14 |
|                                             | CIL-2019/10 | IV    | -   | -   | -   | -   | -    | -   | -   | -  |
|                                             |             | P     | 1.0 | 1.0 | 0.0 | 0.0 | 0.0  | 1.0 | 1.0 | 3  |
|                                             | CIL-2019/13 | IV    | -   | -   | -   | -   | -    | -   | -   | -  |
|                                             | CIL-2019/6  | P     | 1.0 | -   | 0.1 | 0.0 | 8.4  | 0.8 | 1.0 | 6  |
|                                             | CIL-2019/3  | IV    | -   | -   | -   | -   | -    | -   | -   | -  |
|                                             |             | P     | -   | -   | -   | -   | -    | 1.5 | 1.5 | 1  |
|                                             | CIL-2017/25 | IV    | -   | -   | -   | -   | -    | -   | -   | -  |
|                                             |             | P     | 0.9 | 1.0 | 0.2 | 0.0 | 20.9 | 0.2 | 1.2 | 19 |
|                                             | CIL-2017/27 | IV    | -   | -   | -   | -   | -    | -   | -   | -  |
|                                             |             | P     | 0.9 | -   | 0.3 | 0.1 | 28.6 | 0.5 | 1.0 | 4  |
|                                             | CIL-2019/1  | IV    | -   | -   | -   | -   | -    | -   | -   | -  |
|                                             | + CIL-48    | P+QPS | 1.0 | -   | 0.3 | 0.1 | 31.9 | 0.5 | 1.5 | 14 |
| Dikinetids in adoral<br>organelle 1, number | CIL-2017/24 | IV    | -   | -   | -   | -   | -    | -   | -   | -  |
|                                             |             | P     | 4.1 | 4.0 | 0.4 | 0.1 | 10.7 | 3.0 | 5.0 | 21 |
|                                             | CIL-2019/10 | IV    | -   | -   | -   | -   | -    | -   | -   | -  |
|                                             |             | P     | 4.0 | 4.0 | 0.2 | 0.0 | 5.4  | 4.0 | 5.0 | 21 |
|                                             | CIL-2019/13 | IV    | -   | -   | -   | -   | -    | -   | -   | -  |
|                                             | CIL-2019/6  | P     | 3.7 | 4.0 | 0.5 | 0.1 | 13.0 | 3.0 | 4.0 | 19 |
|                                             | CIL-2019/3  | IV    | -   | -   | -   | -   | -    | -   | -   | -  |
|                                             |             | P     | 4.0 | 4.0 | 0.3 | 0.1 | 7.9  | 3.0 | 5.0 | 21 |
|                                             | CIL-2017/25 | IV    | -   | -   | -   | -   | -    | -   | -   | -  |
|                                             |             | P     | 4.0 | 4.0 | 0.0 | 0.0 | 0.0  | 4.0 | 4.0 | 21 |
|                                             | CIL-2017/27 | IV    | -   | -   | -   | -   | -    | -   | -   | -  |
|                                             |             | P     | 4.0 | -   | 0.0 | 0.0 | 0.0  | 4.0 | 4.0 | 14 |
|                                             | CIL-2019/1  | IV    | -   | -   | -   | -   | -    | -   | -   | -  |
|                                             | + CIL-48    | P+QPS | 4.5 | -   | 0.5 | 0.1 | 11.5 | 4.0 | 5.0 | 14 |
| Dikinetids in adoral<br>organelle 2, number | CIL-2017/24 | IV    | -   | -   | -   | -   | -    | -   | -   | -  |
|                                             |             | P     | 2.1 | -   | 0.2 | 0.1 | 11.5 | 2.0 | 3.0 | 18 |

|                                                |             |       |      |      |     |     |      |      |      |
|------------------------------------------------|-------------|-------|------|------|-----|-----|------|------|------|
|                                                | CIL-2019/10 | IV    | -    | -    | -   | -   | -    | -    | -    |
|                                                |             | P     | 2.0  | 2.0  | 0.0 | 0.0 | 0.0  | 2.0  | 2.0  |
|                                                | CIL-2019/13 | IV    | -    | -    | -   | -   | -    | -    | -    |
|                                                | CIL-2019/6  | P     | 2.4  | -    | 0.5 | 0.1 | 21.3 | 2.0  | 3.0  |
|                                                | CIL-2019/3  | IV    | -    | -    | -   | -   | -    | -    | -    |
|                                                |             | P     | 2.8  | -    | 0.5 | 0.3 | 18.2 | 2.0  | 3.0  |
|                                                | CIL-2017/25 | IV    | -    | -    | -   | -   | -    | -    | -    |
|                                                |             | P     | 3.0  | 3.0  | 0.0 | 0.0 | 0.0  | 3.0  | 3.0  |
|                                                | CIL-2017/27 | IV    | -    | -    | -   | -   | -    | -    | -    |
|                                                |             | P     | 3.0  | 3.0  | 0.0 | 0.0 | 0.0  | 3.0  | 3.0  |
|                                                | CIL-2019/1  | IV    | -    | -    | -   | -   | -    | -    | -    |
|                                                | + CIL-48    | P+QPS | 3.2  | -    | 0.4 | 0.1 | 13.2 | 3.0  | 4.0  |
| Dikinetids in adoral<br>organelle 3, number    | CIL-2017/24 | IV    | -    | -    | -   | -   | -    | -    | -    |
|                                                |             | P     | 1.9  | 2.0  | 0.3 | 0.1 | 13.4 | 1.0  | 2.0  |
|                                                | CIL-2019/10 | IV    | -    | -    | -   | -   | -    | -    | -    |
|                                                |             | P     | 2.0  | 2.0  | 0.0 | 0.0 | 0.0  | 2.0  | 2.0  |
|                                                | CIL-2019/13 | IV    | -    | -    | -   | -   | -    | -    | -    |
|                                                | CIL-2019/6  | P     | 2.0  | 2.0  | 0.0 | 0.0 | 0.0  | 2.0  | 2.0  |
|                                                | CIL-2019/3  | IV    | -    | -    | -   | -   | -    | -    | -    |
|                                                |             | P     | -    | -    | -   | -   | -    | 3.0  | 3.0  |
|                                                | CIL-2017/25 | IV    | -    | -    | -   | -   | -    | -    | -    |
|                                                |             | P     | 2.0  | 2.0  | 0.3 | 0.1 | 16.7 | 1.0  | 3.0  |
|                                                | CIL-2017/27 | IV    | -    | -    | -   | -   | -    | -    | -    |
|                                                |             | P     | 2.0  | -    | 0.0 | 0.0 | 0.0  | 2.0  | 2.0  |
|                                                | CIL-2019/1  | IV    | -    | -    | -   | -   | -    | -    | -    |
|                                                | + CIL-48    | P+QPS | 2.4  | -    | 0.5 | 0.1 | 21.1 | 2.0  | 3.0  |
| Circumoral<br>dikinetids/oral flaps,<br>number | CIL-2017/24 | IV    | -    | -    | -   | -   | -    | -    | -    |
|                                                |             | P     | 8.2  | 8.0  | 0.5 | 0.1 | 6.2  | 7.0  | 9.0  |
|                                                | CIL-2019/10 | IV    | -    | -    | -   | -   | -    | -    | -    |
|                                                |             | P     | 8.9  | 9.0  | 0.8 | 0.2 | 9.0  | 8.0  | 10.0 |
|                                                | CIL-2019/13 | IV    | -    | -    | -   | -   | -    | -    | -    |
|                                                | CIL-2019/6  | P     | 10.0 | 10.0 | 1.3 | 0.3 | 13.2 | 7.0  | 12.0 |
|                                                | CIL-2019/3  | IV    | -    | -    | -   | -   | -    | -    | -    |
|                                                |             | P     | 10.2 | 10.0 | 1.1 | 0.2 | 11.1 | 8.0  | 12.0 |
|                                                | CIL-2017/25 | IV    | -    | -    | -   | -   | -    | -    | -    |
|                                                |             | P     | 17.8 | 18.0 | 1.4 | 0.3 | 7.7  | 15.0 | 21.0 |
|                                                | CIL-2017/27 | IV    | -    | -    | -   | -   | -    | -    | -    |
|                                                |             | P     | 16.6 | 17.0 | 1.3 | 0.3 | 7.7  | 15.0 | 19.0 |
|                                                | CIL-2019/1  | IV    | -    | -    | -   | -   | -    | -    | -    |
|                                                |             | P     | 23.0 | 22.0 | 2.7 | 0.6 | 12.0 | 19.0 | 29.0 |
| Oral flaps, length                             | CIL-2017/24 | IV    | -    | -    | -   | -   | -    | -    | -    |
|                                                |             | P     | 1.7  | 1.7  | 0.6 | 0.1 | 32.0 | 1.2  | 3.8  |
|                                                | CIL-2019/10 | IV    | -    | -    | -   | -   | -    | -    | -    |
|                                                |             | P     | 1.4  | 1.3  | 0.2 | 0.1 | 16.8 | 1.2  | 2.1  |
|                                                | CIL-2019/13 | IV    | -    | -    | -   | -   | -    | -    | -    |
|                                                | CIL-2019/6  | P     | 2.0  | 2.1  | 0.4 | 0.1 | 21.8 | 1.2  | 2.9  |
|                                                | CIL-2019/3  | IV    | -    | -    | -   | -   | -    | -    | -    |
|                                                |             | P     | 2.0  | 1.8  | 0.7 | 0.1 | 33.0 | 0.9  | 3.3  |
|                                                | CIL-2017/25 | IV    | -    | -    | -   | -   | -    | -    | -    |
|                                                |             | P     | 2.2  | 2.2  | 0.3 | 0.1 | 14.6 | 1.6  | 2.8  |
|                                                | CIL-2017/27 | IV    | -    | -    | -   | -   | -    | -    | -    |
|                                                |             | P     | 2.0  | 1.9  | 0.3 | 0.1 | 14.2 | 1.5  | 2.7  |





|                                    |             |      |      |     |     |      |      |      |      |    |
|------------------------------------|-------------|------|------|-----|-----|------|------|------|------|----|
|                                    | CIL-2019/3  | IV   | 1.7  | 1.7 | 0.3 | 0.1  | 19.0 | 0.9  | 2.3  | 21 |
|                                    |             | P    | -    | -   | -   | -    | -    | -    | -    | -  |
|                                    | CIL-2017/25 | IV   | -    | -   | -   | -    | -    | -    | -    | -  |
|                                    |             | P    | -    | -   | -   | -    | -    | -    | -    | -  |
|                                    | CIL-2017/27 | IV   | 3.0  | -   | 1.3 | 0.9  | 44.6 | 2.0  | 3.9  | 2  |
|                                    |             | P    | 2.6  | 2.5 | 0.5 | 0.1  | 18.9 | 2.0  | 3.5  | 21 |
|                                    | CIL-2019/1  | IV   | 2.7  | 2.5 | 0.8 | 0.2  | 29.8 | 1.5  | 4.7  | 21 |
|                                    |             | P    | -    | -   | -   | -    | -    | 3.0  | 3.0  | 1  |
| Micronucleus, width                | CIL-2017/24 | IV   | -    | -   | -   | -    | -    | -    | -    | -  |
|                                    |             | P    | -    | -   | -   | -    | -    | -    | -    | -  |
|                                    | CIL-2019/10 | IV   | -    | -   | -   | -    | -    | -    | -    | -  |
|                                    |             | P    | -    | -   | -   | -    | -    | -    | -    | -  |
|                                    | CIL-2019/13 | IV   | 2.2  | 2.1 | 0.3 | 0.1  | 13.6 | 1.6  | 2.7  | 21 |
|                                    | CIL-2019/6  | P    | -    | -   | -   | -    | -    | -    | -    | -  |
|                                    | CIL-2019/3  | IV   | 1.7  | 1.7 | 0.3 | 0.1  | 19.7 | 1.1  | 2.4  | 21 |
|                                    |             | P    | -    | -   | -   | -    | -    | -    | -    | -  |
|                                    | CIL-2017/25 | IV   | -    | -   | -   | -    | -    | -    | -    | -  |
|                                    |             | P    | -    | -   | -   | -    | -    | -    | -    | -  |
|                                    | CIL-2017/27 | IV   | 2.6  | -   | 0.6 | 0.5  | 25.0 | 2.1  | 3.0  | 2  |
|                                    |             | P    | 2.0  | 2.0 | 0.4 | 0.1  | 19.9 | 1.5  | 3.0  | 21 |
|                                    | CIL-2019/1  | IV   | 2.6  | 2.6 | 0.7 | 0.2  | 28.2 | 1.4  | 4.5  | 21 |
|                                    |             | P    | -    | -   | -   | -    | -    | 2.0  | 2.0  | 1  |
| Oral basket, distal diameter       | CIL-2017/24 | IV   | 4.0  | 3.8 | 1.2 | 0.3  | 29.4 | 2.2  | 6.9  | 21 |
|                                    |             | P    | 3.6  | 3.5 | 0.5 | 0.1  | 14.9 | 2.7  | 4.9  | 21 |
|                                    | CIL-2019/10 | IV   | -    | -   | -   | -    | -    | -    | -    | -  |
|                                    |             | P    | 3.6  | 3.5 | 0.7 | 0.2  | 19.5 | 2.5  | 5.0  | 19 |
|                                    | CIL-2019/13 | IV   | -    | -   | -   | -    | -    | -    | -    | -  |
|                                    | CIL-2019/6  | P    | 4.2  | 4.1 | 0.6 | 0.1  | 14.5 | 3.2  | 5.7  | 21 |
|                                    | CIL-2019/3  | IV   | -    | -   | -   | -    | -    | -    | -    | -  |
|                                    |             | P    | 4.1  | 4.0 | 0.6 | 0.1  | 14.4 | 3.0  | 5.2  | 23 |
|                                    | CIL-2017/25 | IV   | -    | -   | -   | -    | -    | -    | -    | -  |
|                                    |             | P    | 4.6  | 4.8 | 0.6 | 0.1  | 13.0 | 3.6  | 5.8  | 21 |
|                                    | CIL-2017/27 | IV   | -    | -   | -   | -    | -    | -    | -    | -  |
|                                    |             | P    | 4.7  | 4.8 | 0.7 | 0.1  | 13.9 | 3.4  | 6.0  | 21 |
| CIL-2019/1                         | IV          | 12.7 | 11.7 | 3.9 | 0.8 | 30.4 | 5.7  | 18.7 | 21   |    |
|                                    | P           | 6.8  | -    | 1.3 | 0.3 | 18.8 | 4.3  | 10.1 | 24   |    |
| Oral basket, length                | CIL-2017/24 | IV   | 3.6  | 3.5 | 1.2 | 0.3  | 32.4 | 2.2  | 6.4  | 21 |
|                                    |             | P    | 8.4  | 8.0 | 1.5 | 0.3  | 17.5 | 5.9  | 11.5 | 21 |
|                                    | CIL-2019/10 | IV   | -    | -   | -   | -    | -    | -    | -    | -  |
|                                    |             | P    | -    | -   | -   | -    | -    | -    | -    | -  |
|                                    | CIL-2019/13 | IV   | -    | -   | -   | -    | -    | -    | -    | -  |
|                                    | CIL-2019/6  | P    | 5.5  | 5.1 | 1.5 | 0.3  | 27.4 | 3.9  | 10.1 | 21 |
|                                    | CIL-2019/3  | IV   | -    | -   | -   | -    | -    | -    | -    | -  |
|                                    |             | P    | 8.4  | 9.0 | 2.5 | 0.8  | 30.2 | 3.9  | 12.0 | 21 |
|                                    | CIL-2017/25 | IV   | -    | -   | -   | -    | -    | -    | -    | -  |
|                                    |             | P    | 10.1 | 9.5 | 2.2 | 0.5  | 21.8 | 6.8  | 15.1 | 21 |
|                                    | CIL-2017/27 | IV   | -    | -   | -   | -    | -    | -    | -    | -  |
|                                    |             | P    | 10.3 | 9.5 | 2.4 | 0.5  | 23.0 | 7.2  | 17.6 | 21 |
| CIL-2019/1                         | IV          | 14.3 | 13.3 | 3.9 | 0.8 | 27.1 | 5.6  | 23.0 | 21   |    |
|                                    | P           | 11.9 | -    | 2.0 | 0.4 | 17.1 | 8.3  | 16.2 | 24   |    |
| Oral basket width:cell width, in % | CIL-2017/24 | IV   | 0.3  | 0.4 | 0.1 | 0.0  | 30.4 | 0.2  | 0.6  | 21 |
|                                    |             | P    | 0.3  | 0.4 | 0.1 | 0.0  | 19.1 | 0.2  | 0.4  | 21 |
